# Supplementary material for: JAK–STAT inhibition impairs K‐RAS‐driven lung adenocarcinoma progression
Source: PubMed Central journal article supplement (PMC6856680; doi:10.1002/ijc.32624), 2019-09-10
Supplement: IJC-145-3376-s003.pdf [file IJC-145-3376-s003.pdf]

| GeneName      | ctrl1 | ctrl2 | ctrl3 | ctrl4 | Ruxo1 | Ruxo2 | Ruxo3 | Ruxo4 | baseMean    | log2FoldChange |
|---------------|-------|-------|-------|-------|-------|-------|-------|-------|-------------|----------------|
| Ccl12         | 75    | 97    | 66    | 70    | 6     | 14    | 7     | 1     | 41.39710775 | -2.544246772   |
| Ch25h         | 540   | 698   | 245   | 587   | 135   | 66    | 42    | 16    | 286.4406661 | -1.98601756    |
| Gm12250       | 347   | 95    | 213   | 369   | 48    | 59    | 21    | 30    | 148.8688933 | -1.813395035   |
| Gm4951        | 376   | 951   | 141   | 432   | 105   | 79    | 51    | 53    | 267.3841877 | -1.779541402   |
| Isg15         | 401   | 264   | 359   | 398   | 130   | 89    | 66    | 67    | 221.3344693 | -1.775899959   |
| Ccr1          | 285   | 356   | 767   | 287   | 151   | 65    | 78    | 32    | 248.9477901 | -1.710781289   |
| Slc17a6       | 27    | 13    | 55    | 15    | 2     | 3     | 1     | 2     | 14.81540035 | -1.638042182   |
| Ifi204        | 132   | 105   | 129   | 153   | 49    | 47    | 26    | 24    | 82.54414019 | -1.607410249   |
| Clca1         | 578   | 279   | 861   | 47    | 9     | 56    | 30    | 32    | 238.0195702 | -1.567371938   |
| Tfec          | 159   | 151   | 139   | 186   | 79    | 28    | 30    | 32    | 99.85047107 | -1.531312984   |
| Alpk2         | 26    | 17    | 17    | 26    | 3     | 3     | 5     | 4     | 12.7004612  | -1.528043382   |
| Lama1         | 305   | 203   | 79    | 183   | 37    | 26    | 28    | 53    | 115.7425455 | -1.524456175   |
| Rsad2         | 241   | 138   | 1846  | 375   | 89    | 76    | 57    | 58    | 359.5635758 | -1.522300146   |
| Ccl7          | 47    | 34    | 45    | 58    | 9     | 7     | 20    | 2     | 27.46431307 | -1.485623937   |
| ligp1         | 2800  | 1217  | 743   | 2861  | 691   | 499   | 288   | 301   | 1177.205432 | -1.478744109   |
| Serpina3f     | 354   | 81    | 141   | 302   | 46    | 41    | 29    | 53    | 133.3556126 | -1.477525535   |
| AU022793      | 93    | 73    | 52    | 77    | 36    | 16    | 14    | 5     | 45.10411759 | -1.476872709   |
| Zbp1          | 463   | 275   | 174   | 493   | 134   | 95    | 66    | 84    | 223.5698934 | -1.43583811    |
| Nlrp3         | 105   | 80    | 236   | 127   | 46    | 53    | 30    | 15    | 85.44661286 | -1.432741399   |
| Serpina3g     | 1035  | 468   | 354   | 1221  | 223   | 235   | 118   | 191   | 484.3659389 | -1.402039843   |
| Pgam2         | 283   | 58    | 69    | 156   | 23    | 50    | 22    | 17    | 85.67872713 | -1.398685119   |
| Ffar2         | 105   | 109   | 45    | 138   | 33    | 41    | 21    | 14    | 62.4193314  | -1.398046403   |
| Plac8         | 364   | 406   | 542   | 403   | 154   | 178   | 123   | 138   | 287.5203724 | -1.39179168    |
| Meg3          | 7336  | 45548 | 5802  | 5436  | 3017  | 1869  | 1460  | 2663  | 8844.214876 | -1.385675321   |
| Ncr1          | 24    | 12    | 12    | 43    | 4     | 4     | 4     | 2     | 13.12814454 | -1.366539803   |
| Sifn1         | 116   | 71    | 503   | 140   | 48    | 58    | 37    | 14    | 122.1855885 | -1.362658625   |
| Gzma          | 229   | 73    | 78    | 175   | 28    | 27    | 36    | 40    | 87.29758043 | -1.356925907   |
| Sept3         | 248   | 233   | 268   | 259   | 109   | 127   | 88    | 55    | 171.258165  | -1.351105786   |
| Ackr1         | 22    | 42    | 38    | 23    | 9     | 9     | 8     | 8     | 19.68001418 | -1.343496826   |
| Sifn2         | 1031  | 937   | 1171  | 1022  | 462   | 556   | 333   | 219   | 707.1524876 | -1.336055284   |
| Marco         | 665   | 984   | 1008  | 932   | 388   | 348   | 345   | 279   | 613.0601012 | -1.332573437   |
| Cxcl10        | 503   | 128   | 60    | 475   | 63    | 39    | 27    | 57    | 172.1242435 | -1.331172407   |
| Cxcl3         | 83    | 209   | 16    | 103   | 24    | 17    | 14    | 17    | 59.23448744 | -1.314513678   |
| Ank1          | 113   | 171   | 322   | 120   | 63    | 81    | 51    | 28    | 116.5692953 | -1.310989811   |
| Irf7          | 577   | 454   | 532   | 619   | 302   | 181   | 174   | 155   | 372.3859781 | -1.30564396    |
| Pim1          | 780   | 1104  | 999   | 899   | 404   | 454   | 434   | 202   | 647.9410312 | -1.300589528   |
| Igtp          | 2345  | 614   | 742   | 1889  | 575   | 401   | 307   | 301   | 903.5848049 | -1.289212286   |
| Cdkn3         | 33    | 70    | 27    | 35    | 14    | 11    | 11    | 11    | 26.15327141 | -1.284524029   |
| P2ry13        | 160   | 133   | 200   | 241   | 91    | 56    | 38    | 6     | 113.3751784 | -1.2824205     |
| Mx1           | 111   | 230   | 78    | 159   | 69    | 47    | 50    | 20    | 93.0877141  | -1.275008474   |
| Rph3a         | 69    | 72    | 244   | 47    | 11    | 27    | 37    | 15    | 64.82854331 | -1.274280597   |
| Lilrb4a       | 615   | 605   | 937   | 642   | 378   | 277   | 181   | 206   | 476.7694587 | -1.262139615   |
| Rtp4          | 493   | 351   | 348   | 510   | 155   | 211   | 196   | 99    | 293.0331133 | -1.258021306   |
| Ube2c         | 154   | 409   | 264   | 216   | 100   | 107   | 43    | 81    | 169.4529115 | -1.250984039   |
| Klrb1c        | 46    | 25    | 16    | 62    | 9     | 12    | 4     | 8     | 22.86508479 | -1.24748584    |
| Ifi44         | 154   | 163   | 127   | 182   | 79    | 62    | 52    | 51    | 108.1089048 | -1.24391463    |
| Klra7         | 13    | 11    | 9     | 17    | 3     | 1     | 3     | 2     | 7.373129808 | -1.236822364   |
| Rab44         | 260   | 239   | 288   | 250   | 125   | 110   | 111   | 81    | 181.8119624 | -1.235656476   |
| Mirg          | 77    | 768   | 22    | 72    | 29    | 18    | 21    | 11    | 121.0518121 | -1.227431346   |
| Tgtp1         | 201   | 139   | 79    | 242   | 74    | 20    | 4     | 23    | 97.54453014 | -1.226252482   |
| Ifit1         | 548   | 362   | 480   | 612   | 236   | 239   | 202   | 132   | 349.0388009 | -1.223020587   |
| Chl1          | 76    | 555   | 135   | 39    | 37    | 43    | 36    | 24    | 113.5820614 | -1.222272028   |
| Socs3         | 1415  | 3485  | 1556  | 1386  | 494   | 413   | 503   | 825   | 1257.791048 | -1.221883283   |
| Ifi47         | 1299  | 906   | 625   | 1130  | 459   | 456   | 339   | 291   | 685.6231402 | -1.211347939   |
| Fpr2          | 354   | 123   | 435   | 379   | 181   | 110   | 75    | 41    | 210.4077907 | -1.202467257   |
| Cadps         | 47    | 26    | 177   | 26    | 12    | 13    | 20    | 5     | 40.47971013 | -1.196066034   |
| Kif5a         | 474   | 302   | 2174  | 249   | 128   | 202   | 225   | 119   | 482.5567234 | -1.195355605   |
| Socs1         | 282   | 261   | 110   | 288   | 85    | 76    | 107   | 12    | 149.6479065 | -1.19468513    |
| Eef1a2        | 345   | 78    | 533   | 273   | 45    | 137   | 101   | 37    | 193.2988324 | -1.185941674   |
| Dctd          | 26    | 48    | 28    | 14    | 13    | 8     | 6     | 5     | 18.12769982 | -1.183878966   |
| Irf9          | 1221  | 1179  | 964   | 1201  | 682   | 496   | 517   | 246   | 800.524285  | -1.182465614   |
| Ccl3          | 81    | 70    | 19    | 49    | 17    | 16    | 8     | 0     | 31.92589454 | -1.178425144   |
| 4931408D14Rik | 29    | 63    | 11    | 17    | 9     | 7     | 6     | 4     | 17.81188524 | -1.174819075   |
| Padi1         | 52    | 236   | 337   | 45    | 30    | 35    | 29    | 42    | 99.65357067 | -1.168882971   |
| Tgm1          | 259   | 468   | 194   | 298   | 160   | 74    | 67    | 110   | 202.3067277 | -1.164660444   |
| Tmem130       | 58    | 39    | 212   | 35    | 14    | 30    | 22    | 11    | 52.2813095  | -1.162351445   |
| Slc35f1       | 53    | 231   | 102   | 41    | 23    | 16    | 19    | 35    | 64.18579801 | -1.161534125   |
| Gda           | 887   | 1055  | 3885  | 1198  | 550   | 441   | 399   | 597   | 1130.320144 | -1.160229409   |
| Cdc25c        | 23    | 58    | 18    | 20    | 14    | 4     | 7     | 4     | 18.01975973 | -1.155233174   |
| E230016K23Rik | 13    | 21    | 10    | 14    | 3     | 3     | 6     | 2     | 8.860607608 | -1.152876659   |
| Cdk5r2        | 25    | 30    | 115   | 21    | 9     | 10    | 15    | 8     | 28.94969794 | -1.147473153   |
| Apol9a        | 32    | 30    | 20    | 19    | 6     | 6     | 13    | 6     | 16.43483944 | -1.14689179    |
| Sst           | 56    | 32    | 140   | 21    | 8     | 13    | 22    | 11    | 37.92410051 | -1.143573266   |
| Ii18rap       | 321   | 1121  | 515   | 327   | 254   | 222   | 163   | 158   | 376.3445577 | -1.133813379   |
| Tnf           | 97    | 75    | 28    | 77    | 29    | 25    | 20    | 2     | 43.29569572 | -1.133309831   |
| Eldr          | 16    | 16    | 12    | 15    | 7     | 3     | 3     | 3     | 9.305253129 | -1.130956445   |

|               |      |       |      |      |      |      |     |      |             |              |
|---------------|------|-------|------|------|------|------|-----|------|-------------|--------------|
| Arg1          | 73   | 817   | 72   | 73   | 48   | 46   | 22  | 35   | 141.9386009 | -1.130146525 |
| Tnfsf9        | 1362 | 1191  | 315  | 1184 | 667  | 241  | 198 | 118  | 648.9669969 | -1.127574047 |
| Irgm1         | 1757 | 1301  | 875  | 1712 | 784  | 692  | 590 | 312  | 990.7894441 | -1.124112602 |
| Proz          | 62   | 91    | 17   | 65   | 22   | 22   | 20  | 7    | 37.41312757 | -1.122314967 |
| Cntn2         | 36   | 11    | 107  | 13   | 7    | 6    | 9   | 1    | 23.64683917 | -1.119513166 |
| Ms4a4c        | 88   | 49    | 102  | 93   | 23   | 48   | 38  | 15   | 56.46699718 | -1.119072783 |
| Prg4          | 12   | 131   | 311  | 28   | 17   | 25   | 15  | 5    | 66.38679317 | -1.117579365 |
| Serpina3h     | 62   | 23    | 19   | 30   | 12   | 13   | 10  | 2    | 21.24026762 | -1.113009593 |
| Cd300lf       | 337  | 366   | 614  | 279  | 262  | 113  | 63  | 114  | 266.4152477 | -1.108476249 |
| Apol9b        | 51   | 64    | 34   | 75   | 28   | 20   | 17  | 19   | 38.28262543 | -1.107844893 |
| Mobp          | 23   | 13    | 104  | 8    | 0    | 2    | 5   | 2    | 19.65580837 | -1.106318783 |
| Pbld2         | 280  | 767   | 159  | 328  | 172  | 122  | 116 | 110  | 251.7232585 | -1.106084391 |
| Gbp4          | 1458 | 476   | 595  | 1282 | 496  | 405  | 323 | 209  | 654.4729645 | -1.105663333 |
| Syt13         | 26   | 29    | 137  | 27   | 7    | 14   | 18  | 9    | 33.19925196 | -1.09913792  |
| Bcl3          | 563  | 995   | 441  | 750  | 268  | 166  | 250 | 311  | 468.3367838 | -1.097815966 |
| Usp29         | 20   | 11    | 85   | 7    | 4    | 2    | 4   | 4    | 17.19156334 | -1.095955118 |
| Syn1          | 126  | 91    | 363  | 76   | 45   | 45   | 63  | 45   | 106.8130833 | -1.092705233 |
| Oasl2         | 1134 | 840   | 1163 | 1155 | 578  | 539  | 442 | 382  | 775.9147595 | -1.091877506 |
| Btbd17        | 28   | 43    | 28   | 19   | 10   | 12   | 7   | 11   | 19.66847761 | -1.088827999 |
| Rasgrp4       | 215  | 128   | 478  | 233  | 79   | 120  | 102 | 82   | 179.6526276 | -1.084945363 |
| Mapk10        | 91   | 40    | 197  | 85   | 16   | 50   | 42  | 14   | 66.40422421 | -1.084038525 |
| Saa3          | 52   | 319   | 231  | 74   | 56   | 35   | 28  | 54   | 104.5142526 | -1.081076766 |
| Atp1a3        | 322  | 285   | 1522 | 213  | 115  | 157  | 241 | 107  | 368.1719372 | -1.078469433 |
| Lilr4b        | 305  | 350   | 579  | 327  | 203  | 159  | 116 | 159  | 274.2919269 | -1.073130112 |
| Baalc         | 45   | 20    | 122  | 12   | 4    | 9    | 15  | 7    | 29.3342137  | -1.072868126 |
| Tgtp2         | 209  | 109   | 159  | 251  | 89   | 96   | 75  | 47   | 128.557252  | -1.071835574 |
| Wfdc21        | 240  | 153   | 626  | 240  | 119  | 89   | 62  | 124  | 208.5403689 | -1.07065746  |
| Myc           | 302  | 448   | 278  | 352  | 172  | 177  | 145 | 130  | 248.0411401 | -1.069492469 |
| Sema6b        | 419  | 593   | 626  | 451  | 260  | 314  | 255 | 136  | 374.8539412 | -1.066778244 |
| Mnda          | 83   | 44    | 26   | 97   | 25   | 28   | 23  | 7    | 41.16585137 | -1.066680828 |
| Epb4.2        | 15   | 13    | 133  | 14   | 6    | 7    | 2   | 5    | 24.33738458 | -1.065005235 |
| Ccr2          | 835  | 661   | 716  | 981  | 415  | 466  | 285 | 58   | 539.5299004 | -1.064458336 |
| Sh2d5         | 27   | 38    | 56   | 20   | 12   | 10   | 19  | 7    | 23.29346459 | -1.064104053 |
| Ttk           | 36   | 91    | 32   | 45   | 21   | 24   | 18  | 12   | 34.07019076 | -1.063735644 |
| Pcsk1n        | 88   | 53    | 329  | 31   | 18   | 34   | 39  | 21   | 76.49227459 | -1.060562547 |
| Ltb4r1        | 53   | 98    | 211  | 64   | 45   | 46   | 37  | 22   | 70.79155574 | -1.060378128 |
| Lamp5         | 7    | 7     | 30   | 5    | 1    | 1    | 2   | 0    | 6.559902069 | -1.058569075 |
| Ifitm6        | 12   | 16    | 513  | 40   | 5    | 7    | 10  | 7    | 76.08474967 | -1.058202167 |
| Scimp         | 209  | 151   | 40   | 192  | 70   | 54   | 22  | 39   | 96.98083389 | -1.056746589 |
| Ifi205        | 111  | 65    | 51   | 139  | 47   | 49   | 19  | 8    | 60.13552791 | -1.055929006 |
| Tagln3        | 47   | 38    | 104  | 18   | 16   | 15   | 22  | 3    | 32.33655358 | -1.055196022 |
| Alox15        | 23   | 144   | 295  | 11   | 1    | 21   | 4   | 3    | 61.41142214 | -1.051888985 |
| Gm6116        | 10   | 10    | 8    | 6    | 3    | 0    | 1   | 1    | 4.847874415 | -1.050867358 |
| Slc39a2       | 216  | 301   | 105  | 202  | 89   | 51   | 29  | 92   | 136.2245994 | -1.050662594 |
| 5830416P10Rik | 31   | 69    | 106  | 22   | 18   | 30   | 8   | 5    | 35.18884661 | -1.050204971 |
| Rgs16         | 130  | 337   | 68   | 154  | 93   | 75   | 39  | 29   | 112.1860608 | -1.049732068 |
| Lrrc3b        | 19   | 25    | 11   | 20   | 8    | 7    | 7   | 3    | 12.27183064 | -1.0466726   |
| 3110035E14Rik | 28   | 31    | 147  | 20   | 8    | 16   | 14  | 12   | 34.43564088 | -1.044355635 |
| Wfdc17        | 246  | 359   | 987  | 179  | 121  | 95   | 61  | 180  | 280.907116  | -1.042401368 |
| Nrsn1         | 41   | 42    | 192  | 30   | 9    | 20   | 26  | 17   | 47.08308589 | -1.040593778 |
| Bcl2l15       | 19   | 298   | 30   | 13   | 6    | 9    | 6   | 12   | 47.0340541  | -1.038467449 |
| Nos1          | 34   | 21    | 111  | 17   | 6    | 13   | 13  | 10   | 28.18993596 | -1.038135785 |
| S1pr5         | 36   | 11    | 34   | 34   | 9    | 8    | 14  | 1    | 18.19799376 | -1.036708918 |
| Gal           | 144  | 56    | 42   | 123  | 47   | 21   | 20  | 30   | 61.00229029 | -1.036173244 |
| Ccl2          | 46   | 44    | 69   | 61   | 26   | 15   | 33  | 16   | 38.48353733 | -1.034457566 |
| Ankle1        | 40   | 73    | 26   | 48   | 19   | 18   | 11  | 19   | 31.59567252 | -1.033218724 |
| Fcgr1         | 230  | 210   | 83   | 198  | 122  | 78   | 44  | 38   | 123.5246126 | -1.032689637 |
| Cdh8          | 11   | 18    | 26   | 8    | 4    | 4    | 3   | 5    | 9.864937575 | -1.03238637  |
| Cenpk         | 34   | 52    | 21   | 43   | 17   | 16   | 18  | 8    | 25.6333846  | -1.025939488 |
| Nos2          | 226  | 227   | 145  | 229  | 138  | 79   | 67  | 78   | 147.8423816 | -1.019421511 |
| Tub           | 71   | 61    | 149  | 38   | 32   | 32   | 36  | 19   | 54.25423549 | -1.017863165 |
| Fsd1          | 8    | 9     | 22   | 10   | 2    | 1    | 5   | 2    | 7.347840307 | -1.01770299  |
| BC030867      | 34   | 315   | 12   | 37   | 26   | 7    | 5   | 7    | 52.78112031 | -1.016057782 |
| Fam167b       | 32   | 182   | 5    | 61   | 17   | 10   | 10  | 9    | 39.3797271  | -1.015681497 |
| Lrg1          | 9275 | 25367 | 5170 | 6412 | 4140 | 1244 | 925 | 4437 | 7075.824532 | -1.0146294   |
| G530011O06Rik | 31   | 41    | 34   | 31   | 24   | 9    | 14  | 8    | 23.60038567 | -1.014293619 |
| Gbp5          | 740  | 250   | 220  | 774  | 237  | 228  | 184 | 108  | 341.9004733 | -1.013592403 |
| Kcnj3         | 87   | 12    | 110  | 47   | 10   | 30   | 19  | 7    | 40.27490241 | -1.012432706 |
| Svop          | 33   | 31    | 119  | 18   | 16   | 17   | 15  | 9    | 31.95763422 | -1.012350904 |
| Slc6a1        | 65   | 47    | 321  | 28   | 21   | 27   | 38  | 19   | 70.4906328  | -1.008911043 |
| Cdc20         | 267  | 619   | 107  | 369  | 181  | 151  | 113 | 59   | 226.6949156 | -1.007772884 |
| Pilra         | 319  | 287   | 308  | 294  | 207  | 99   | 71  | 127  | 214.0476774 | -1.006431901 |
| Iqsec3        | 23   | 25    | 158  | 14   | 7    | 10   | 18  | 5    | 32.21372485 | -1.00332812  |
| Dlgap5        | 40   | 103   | 49   | 77   | 39   | 35   | 24  | 10   | 45.68876447 | -1.003163371 |
| Csmd3         | 6    | 9     | 44   | 8    | 2    | 3    | 3   | 2    | 9.566179711 | -1.002981012 |
| Rpl3l         | 24   | 13    | 9    | 11   | 6    | 2    | 2   | 4    | 8.96421104  | -1.000766891 |
| Serpina3i     | 28   | 16    | 19   | 35   | 6    | 5    | 3   | 12   | 15.88292185 | -1.000547013 |

|               |      |      |      |      |     |      |      |     |             |              |
|---------------|------|------|------|------|-----|------|------|-----|-------------|--------------|
| Fam150a       | 125  | 162  | 54   | 91   | 37  | 37   | 13   | 50  | 71.57549043 | -0.999940683 |
| Cd209d        | 14   | 8    | 12   | 6    | 4   | 1    | 1    | 2   | 6.02853272  | -0.99967683  |
| Sell          | 212  | 130  | 904  | 228  | 96  | 191  | 123  | 39  | 236.9669339 | -0.996868234 |
| Ctnna2        | 17   | 16   | 82   | 13   | 4   | 10   | 9    | 5   | 19.39394063 | -0.995237635 |
| Dlk1          | 433  | 3213 | 120  | 169  | 100 | 33   | 53   | 38  | 495.5300982 | -0.995193586 |
| Fabp7         | 12   | 14   | 33   | 3    | 0   | 1    | 1    | 3   | 8.435770039 | -0.995000103 |
| Ptges         | 974  | 3720 | 737  | 921  | 671 | 564  | 515  | 485 | 1047.448671 | -0.994103534 |
| Klra2         | 261  | 184  | 303  | 282  | 199 | 103  | 86   | 75  | 184.8514003 | -0.993020176 |
| Gbp6          | 886  | 286  | 242  | 732  | 235 | 192  | 121  | 211 | 368.5342932 | -0.99262159  |
| Gng3          | 29   | 24   | 71   | 13   | 10  | 13   | 13   | 6   | 22.16320481 | -0.992217654 |
| Grik3         | 25   | 16   | 104  | 6    | 4   | 8    | 5    | 0   | 20.78974813 | -0.991827726 |
| Gpr35         | 124  | 131  | 111  | 145  | 91  | 74   | 46   | 23  | 91.05483917 | -0.9917478   |
| Ncf4          | 318  | 233  | 417  | 244  | 135 | 217  | 103  | 92  | 217.9665104 | -0.991670947 |
| Relt          | 116  | 117  | 259  | 140  | 58  | 92   | 66   | 55  | 112.2461469 | -0.990734055 |
| Il1f9         | 24   | 27   | 327  | 36   | 13  | 23   | 22   | 13  | 60.31345174 | -0.988575758 |
| Fgr           | 346  | 280  | 808  | 336  | 254 | 177  | 137  | 157 | 310.9159919 | -0.988040716 |
| Cxcl5         | 73   | 262  | 17   | 48   | 21  | 10   | 9    | 29  | 57.66477675 | -0.987948027 |
| Cntnap2       | 13   | 30   | 57   | 10   | 4   | 7    | 12   | 4   | 16.85753572 | -0.986629608 |
| Al607873      | 213  | 156  | 215  | 232  | 117 | 124  | 89   | 19  | 142.3001469 | -0.986321108 |
| Vat1l         | 29   | 20   | 117  | 9    | 4   | 9    | 8    | 10  | 25.91538287 | -0.984652152 |
| Nusap1        | 93   | 228  | 190  | 150  | 100 | 80   | 32   | 57  | 114.495646  | -0.984038522 |
| Oas3          | 150  | 106  | 159  | 174  | 117 | 61   | 23   | 32  | 101.4283939 | -0.983830963 |
| Amer2         | 7    | 18   | 33   | 7    | 4   | 3    | 5    | 0   | 9.369721887 | -0.983049147 |
| Scn1a         | 16   | 10   | 72   | 11   | 4   | 8    | 6    | 4   | 16.32596052 | -0.981484505 |
| Aqp9          | 20   | 30   | 106  | 25   | 14  | 13   | 5    | 14  | 28.39434752 | -0.980796994 |
| Ndr4          | 366  | 346  | 1091 | 220  | 153 | 208  | 252  | 135 | 344.0358975 | -0.980205298 |
| Ntsr2         | 15   | 33   | 64   | 11   | 6   | 8    | 12   | 7   | 19.30285077 | -0.979573451 |
| Ptgds         | 15   | 6    | 36   | 9    | 1   | 4    | 1    | 4   | 9.632599351 | -0.979077467 |
| Osmr          | 1721 | 2256 | 1885 | 2281 | 877 | 1093 | 1096 | 880 | 1503.46104  | -0.977968405 |
| A330032B11Rik | 8    | 8    | 2    | 9    | 0   | 1    | 0    | 0   | 3.475414341 | -0.977280949 |
| E230029C05Rik | 36   | 31   | 8    | 16   | 4   | 12   | 5    | 4   | 14.38650471 | -0.977127104 |
| B4galt6       | 253  | 2514 | 331  | 228  | 177 | 258  | 212  | 156 | 495.5853105 | -0.976765939 |
| Synpr         | 19   | 47   | 79   | 11   | 4   | 11   | 14   | 9   | 24.01521842 | -0.976523648 |
| C130050O18Rik | 105  | 96   | 86   | 91   | 76  | 40   | 24   | 26  | 67.10721907 | -0.976492242 |
| Ccnb2         | 113  | 353  | 116  | 192  | 90  | 74   | 73   | 74  | 133.610139  | -0.976397588 |
| Rab33a        | 13   | 5    | 13   | 12   | 3   | 4    | 3    | 1   | 6.710410731 | -0.970893586 |
| Fcgr3         | 976  | 1080 | 977  | 926  | 597 | 438  | 421  | 456 | 732.0942962 | -0.970295297 |
| Gatm          | 305  | 348  | 159  | 268  | 151 | 157  | 91   | 96  | 194.8973861 | -0.969396089 |
| Ankr22        | 35   | 353  | 37   | 16   | 28  | 15   | 8    | 15  | 60.63380594 | -0.967425271 |
| Trim30b       | 32   | 18   | 279  | 43   | 11  | 29   | 18   | 13  | 55.18833126 | -0.96714306  |
| Klra3         | 15   | 13   | 6    | 16   | 6   | 1    | 2    | 3   | 7.752126839 | -0.966939057 |
| Miat          | 91   | 75   | 399  | 42   | 27  | 54   | 64   | 18  | 95.17615402 | -0.966542227 |
| Hrh3          | 12   | 18   | 67   | 10   | 4   | 9    | 8    | 3   | 16.16049734 | -0.965874214 |
| Hfe2          | 71   | 5    | 129  | 46   | 18  | 17   | 11   | 11  | 38.77107989 | -0.964957086 |
| Cd244         | 148  | 93   | 287  | 158  | 112 | 86   | 53   | 40  | 120.6559726 | -0.964181823 |
| Cdh3          | 22   | 49   | 63   | 23   | 13  | 14   | 17   | 14  | 26.66122819 | -0.962767476 |
| Gpr141        | 84   | 69   | 214  | 120  | 67  | 72   | 35   | 13  | 82.44046749 | -0.962605878 |
| Lrrc25        | 107  | 125  | 164  | 110  | 90  | 72   | 49   | 28  | 91.1947029  | -0.962098574 |
| Aldh1a3       | 21   | 403  | 47   | 28   | 29  | 18   | 20   | 17  | 69.55087746 | -0.962045485 |
| Gad2          | 49   | 20   | 255  | 19   | 9   | 23   | 23   | 8   | 50.52220519 | -0.961702926 |
| Emilin2       | 233  | 250  | 1172 | 275  | 207 | 106  | 107  | 176 | 316.9190738 | -0.961140047 |
| Tlr6          | 31   | 19   | 61   | 21   | 14  | 14   | 12   | 1   | 21.19496763 | -0.961080907 |
| Tpx2          | 189  | 416  | 154  | 284  | 166 | 116  | 79   | 90  | 183.6365922 | -0.960223531 |
| Ivl           | 48   | 119  | 32   | 64   | 34  | 16   | 2    | 1   | 38.13898889 | -0.958972856 |
| Elfn2         | 24   | 23   | 90   | 13   | 14  | 14   | 9    | 5   | 23.67494979 | -0.956241688 |
| Adgrb2        | 57   | 65   | 258  | 57   | 28  | 48   | 50   | 20  | 71.97764079 | -0.956240283 |
| Pianp         | 81   | 61   | 137  | 48   | 36  | 46   | 37   | 21  | 57.7720438  | -0.954701607 |
| A530064D06Rik | 9    | 10   | 108  | 13   | 6   | 3    | 1    | 5   | 19.39421699 | -0.953267926 |
| Tnnc1         | 470  | 15   | 359  | 427  | 51  | 149  | 58   | 29  | 195.6493582 | -0.95286666  |
| Mmp13         | 109  | 101  | 26   | 41   | 45  | 23   | 12   | 12  | 45.43809009 | -0.952422809 |
| Inpp5j        | 81   | 132  | 59   | 78   | 55  | 52   | 25   | 23  | 61.78864057 | -0.952137106 |
| Xlr3a         | 26   | 21   | 55   | 62   | 8   | 12   | 27   | 8   | 27.19136719 | -0.952093296 |
| Svopl         | 15   | 169  | 9    | 9    | 10  | 5    | 4    | 2   | 26.41380643 | -0.951417655 |
| Pdxp          | 89   | 134  | 120  | 109  | 65  | 58   | 67   | 11  | 79.20544409 | -0.95041668  |
| Mki67         | 589  | 1287 | 590  | 870  | 474 | 479  | 307  | 298 | 601.2989549 | -0.949139806 |
| Fam26f        | 95   | 63   | 20   | 79   | 24  | 37   | 24   | 6   | 42.80023529 | -0.94891248  |
| Gria4         | 23   | 21   | 105  | 18   | 12  | 14   | 15   | 6   | 26.45152035 | -0.948653359 |
| Megf10        | 37   | 32   | 33   | 18   | 16  | 14   | 7    | 11  | 20.94999217 | -0.948106189 |
| Snap91        | 64   | 47   | 241  | 38   | 15  | 31   | 50   | 15  | 62.14564785 | -0.947635334 |
| Gm5607        | 8    | 29   | 23   | 7    | 7   | 1    | 4    | 3   | 10.0334516  | -0.947588755 |
| Unc13c        | 26   | 10   | 135  | 10   | 3   | 5    | 9    | 8   | 25.94968406 | -0.943655543 |
| Elavl3        | 44   | 35   | 170  | 23   | 12  | 16   | 35   | 4   | 41.79703467 | -0.943623076 |
| Mgl2          | 676  | 779  | 388  | 527  | 360 | 276  | 225  | 252 | 433.0017301 | -0.943369592 |
| AF357359      | 20   | 234  | 15   | 26   | 26  | 6    | 6    | 4   | 39.97819421 | -0.943006166 |
| Nefh          | 20   | 35   | 36   | 13   | 15  | 11   | 8    | 5   | 17.47700929 | -0.942976596 |
| Gpr84         | 10   | 15   | 12   | 12   | 6   | 6    | 2    | 0   | 7.626208527 | -0.94147116  |
| Oas2          | 359  | 230  | 199  | 383  | 182 | 165  | 54   | 99  | 208.1184478 | -0.941305327 |

|               |      |      |      |      |      |      |      |      |             |              |              |
|---------------|------|------|------|------|------|------|------|------|-------------|--------------|--------------|
| Gm4841        | 278  | 71   | 12   | 174  | 24   | 1    | 4    | 4    | 23          | 75.27098906  | -0.941018678 |
| Hcar2         | 313  | 274  | 151  | 287  | 130  | 118  | 128  | 107  | 188.2028994 | -0.940518937 |              |
| Gbp10         | 41   | 14   | 5    | 32   | 7    | 7    | 2    | 5    | 14.28379609 | -0.940257127 |              |
| Grin1         | 62   | 140  | 309  | 35   | 31   | 45   | 64   | 28   | 87.96374254 | -0.937629626 |              |
| Knstrn        | 94   | 295  | 66   | 206  | 64   | 71   | 49   | 64   | 112.1930524 | -0.937602869 |              |
| Hrc           | 208  | 12   | 70   | 136  | 10   | 49   | 22   | 3    | 64.1603266  | -0.93586012  |              |
| Glrb          | 26   | 29   | 100  | 23   | 7    | 15   | 20   | 12   | 28.93105349 | -0.935618    |              |
| Selp          | 37   | 126  | 210  | 80   | 42   | 46   | 44   | 38   | 76.99628348 | -0.935491081 |              |
| Lcp2          | 385  | 368  | 457  | 452  | 306  | 262  | 156  | 105  | 305.7399015 | -0.933970717 |              |
| Add2          | 41   | 32   | 269  | 27   | 15   | 21   | 35   | 14   | 56.45611691 | -0.933842059 |              |
| Gbp3          | 1092 | 506  | 486  | 1119 | 442  | 481  | 319  | 233  | 581.7972676 | -0.932589824 |              |
| Nsg2          | 168  | 108  | 475  | 94   | 59   | 94   | 110  | 44   | 142.8257049 | -0.93138375  |              |
| Aldh1b1       | 98   | 38   | 86   | 75   | 32   | 57   | 17   | 14   | 51.62913385 | -0.931310399 |              |
| Arpp21        | 30   | 46   | 148  | 18   | 12   | 17   | 29   | 10   | 38.2857611  | -0.928909511 |              |
| Ube2l6        | 928  | 824  | 3722 | 1234 | 648  | 714  | 586  | 623  | 1160.105439 | -0.927516646 |              |
| Ttc9b         | 9    | 6    | 15   | 9    | 2    | 3    | 2    | 3    | 6.171627523 | -0.926169586 |              |
| Slc6a11       | 20   | 16   | 81   | 7    | 5    | 5    | 12   | 4    | 18.65004661 | -0.925460441 |              |
| Rims1         | 16   | 20   | 78   | 19   | 7    | 7    | 13   | 10   | 21.28203178 | -0.925213498 |              |
| Srl           | 265  | 52   | 292  | 414  | 95   | 133  | 94   | 15   | 167.8886737 | -0.924882342 |              |
| Pbp2          | 23   | 153  | 20   | 23   | 17   | 8    | 12   | 14   | 32.76792103 | -0.924217588 |              |
| Hpca          | 22   | 31   | 147  | 20   | 12   | 16   | 20   | 11   | 34.61571959 | -0.923105531 |              |
| Clec4d        | 52   | 75   | 537  | 51   | 47   | 41   | 34   | 45   | 110.163234  | -0.922939584 |              |
| Rtn4rl2       | 34   | 27   | 94   | 48   | 23   | 22   | 16   | 18   | 35.21060803 | -0.922230295 |              |
| Lmo3          | 21   | 24   | 80   | 14   | 13   | 14   | 9    | 1    | 21.49477411 | -0.922179196 |              |
| Rbfox1        | 54   | 53   | 193  | 44   | 21   | 39   | 44   | 18   | 57.64723795 | -0.920537568 |              |
| Dlgap1        | 62   | 67   | 253  | 50   | 27   | 47   | 57   | 17   | 71.46071885 | -0.918826834 |              |
| Mast1         | 48   | 74   | 100  | 27   | 25   | 31   | 35   | 8    | 42.41485458 | -0.918737376 |              |
| C5ar1         | 267  | 180  | 544  | 301  | 220  | 152  | 129  | 90   | 232.8638504 | -0.917464286 |              |
| Trdn          | 144  | 4    | 53   | 64   | 13   | 23   | 15   | 3    | 40.29037432 | -0.917463917 |              |
| Troap         | 25   | 61   | 16   | 27   | 12   | 15   | 13   | 9    | 21.79632389 | -0.917186047 |              |
| Fcgr2b        | 655  | 786  | 482  | 599  | 376  | 347  | 264  | 277  | 470.1493341 | -0.917182144 |              |
| E2f8          | 37   | 92   | 53   | 78   | 48   | 27   | 27   | 12   | 45.41996195 | -0.916314063 |              |
| Cd200r1       | 183  | 154  | 105  | 161  | 118  | 68   | 56   | 48   | 110.4251653 | -0.915172497 |              |
| Syt1          | 154  | 153  | 681  | 93   | 53   | 116  | 130  | 52   | 177.2425224 | -0.913521563 |              |
| Lmtk3         | 59   | 81   | 237  | 44   | 30   | 46   | 51   | 25   | 70.8151062  | -0.912552502 |              |
| Batf3         | 122  | 74   | 30   | 92   | 40   | 47   | 29   | 17   | 55.81045285 | -0.911230681 |              |
| Sncb          | 41   | 27   | 128  | 17   | 11   | 18   | 25   | 9    | 34.26557306 | -0.910792782 |              |
| Cyp4f18       | 321  | 253  | 543  | 264  | 159  | 157  | 119  | 176  | 250.8294597 | -0.910701901 |              |
| Trim9         | 39   | 30   | 140  | 24   | 16   | 16   | 24   | 17   | 38.27721863 | -0.910564496 |              |
| Adgrb3        | 18   | 15   | 65   | 10   | 7    | 7    | 11   | 5    | 17.14355271 | -0.910094607 |              |
| Trank1        | 55   | 42   | 331  | 31   | 18   | 36   | 43   | 18   | 71.29420664 | -0.910040468 |              |
| Cacna1f       | 14   | 10   | 10   | 9    | 5    | 4    | 3    | 2    | 7.063805385 | -0.909617409 |              |
| Lst1          | 125  | 94   | 110  | 88   | 63   | 28   | 33   | 55   | 75.2687595  | -0.90801532  |              |
| Fam64a        | 27   | 111  | 26   | 68   | 27   | 31   | 12   | 3    | 36.58287107 | -0.907019408 |              |
| Elf3          | 1468 | 2884 | 866  | 1390 | 965  | 702  | 811  | 575  | 1186.895115 | -0.906347644 |              |
| Acsl6         | 27   | 26   | 87   | 15   | 11   | 16   | 18   | 5    | 25.2355875  | -0.905753481 |              |
| 5430437J10Rik | 59   | 51   | 22   | 44   | 25   | 20   | 17   | 15   | 31.44032646 | -0.905503946 |              |
| Cd274         | 627  | 322  | 338  | 690  | 331  | 281  | 182  | 148  | 362.3030049 | -0.905487257 |              |
| Cited4        | 79   | 69   | 84   | 74   | 51   | 51   | 31   | 20   | 56.42965633 | -0.905306064 |              |
| Car9          | 35   | 66   | 29   | 33   | 30   | 19   | 13   | 6    | 27.99151097 | -0.904406967 |              |
| Irgm2         | 2008 | 534  | 764  | 2003 | 855  | 603  | 536  | 148  | 921.0868657 | -0.904333784 |              |
| Nap1l2        | 24   | 22   | 75   | 19   | 3    | 21   | 11   | 4    | 22.07053992 | -0.904101742 |              |
| Tmem91        | 8    | 7    | 25   | 5    | 3    | 3    | 1    | 2    | 6.728796989 | -0.904048566 |              |
| Adra2a        | 59   | 112  | 127  | 50   | 23   | 36   | 41   | 41   | 61.10813839 | -0.903778363 |              |
| Dync1i1       | 12   | 18   | 54   | 10   | 4    | 4    | 11   | 5    | 14.66897731 | -0.90369807  |              |
| Snap25        | 191  | 162  | 841  | 118  | 45   | 119  | 169  | 70   | 213.2529972 | -0.901012952 |              |
| C5ar2         | 219  | 284  | 119  | 217  | 154  | 114  | 92   | 38   | 150.6816236 | -0.900987622 |              |
| Cxcl1         | 110  | 162  | 35   | 125  | 47   | 27   | 12   | 50   | 71.36264256 | -0.900845588 |              |
| Steap4        | 226  | 318  | 915  | 239  | 190  | 195  | 173  | 141  | 297.2005294 | -0.900720426 |              |
| Scn2b         | 45   | 44   | 179  | 33   | 23   | 24   | 41   | 14   | 49.82478655 | -0.900486443 |              |
| Cpne4         | 15   | 19   | 57   | 9    | 6    | 5    | 8    | 8    | 15.91433057 | -0.899913847 |              |
| Kcnn3         | 72   | 130  | 104  | 111  | 62   | 56   | 52   | 40   | 77.31506874 | -0.899224522 |              |
| Csf2          | 291  | 312  | 67   | 229  | 178  | 70   | 53   | 18   | 148.3290472 | -0.898462421 |              |
| Pirb          | 613  | 441  | 1060 | 562  | 389  | 371  | 227  | 276  | 491.3883593 | -0.89676555  |              |
| Bpgm          | 1114 | 1180 | 8907 | 1467 | 1027 | 1170 | 939  | 853  | 2073.724897 | -0.896638411 |              |
| Pacsin1       | 80   | 68   | 236  | 53   | 33   | 56   | 57   | 23   | 74.86841984 | -0.896619395 |              |
| Gjb5          | 50   | 138  | 67   | 49   | 27   | 35   | 28   | 35   | 53.16375394 | -0.896042645 |              |
| Sbno2         | 1948 | 2731 | 2333 | 2310 | 1416 | 1366 | 1226 | 966  | 1767.435128 | -0.895355624 |              |
| Lilra6        | 8    | 30   | 135  | 22   | 7    | 11   | 9    | 13   | 29.35939469 | -0.894603816 |              |
| Gbp11         | 28   | 6    | 14   | 13   | 6    | 5    | 3    | 4    | 9.996816537 | -0.893936502 |              |
| Slc1a2        | 322  | 214  | 1515 | 163  | 88   | 188  | 269  | 107  | 356.4725592 | -0.893596154 |              |
| Rxrg          | 26   | 4    | 42   | 24   | 5    | 8    | 9    | 5    | 15.45669997 | -0.893331507 |              |
| Siglece       | 93   | 107  | 283  | 87   | 59   | 73   | 23   | 58   | 97.9068337  | -0.893318155 |              |
| Il4ra         | 3013 | 5363 | 3344 | 3216 | 2502 | 1729 | 1682 | 1589 | 2771.737422 | -0.893171567 |              |
| Adprhl1       | 32   | 6    | 23   | 40   | 6    | 7    | 14   | 2    | 16.19349604 | -0.892416352 |              |
| Kcnq2         | 58   | 51   | 310  | 34   | 21   | 40   | 50   | 18   | 72.08563996 | -0.892323193 |              |
| Vstm2l        | 10   | 16   | 41   | 5    | 5    | 4    | 6    | 3    | 11.11827336 | -0.891602579 |              |

|               |      |      |      |      |     |     |     |     |             |               |
|---------------|------|------|------|------|-----|-----|-----|-----|-------------|---------------|
| Diras1        | 13   | 15   | 62   | 8    | 2   | 5   | 11  | 2   | 14.58581327 | -0.891576333  |
| Spi1          | 925  | 864  | 1041 | 827  | 652 | 484 | 310 | 398 | 684.2625002 | -0.890282761  |
| Cck           | 22   | 23   | 79   | 12   | 5   | 5   | 19  | 6   | 21.25695843 | -0.890061547  |
| Grrp1         | 522  | 426  | 335  | 499  | 265 | 245 | 306 | 86  | 329.105264  | -0.889813931  |
| Lgi1          | 29   | 23   | 90   | 17   | 11  | 20  | 16  | 6   | 26.15182883 | -0.889738672  |
| Cspg5         | 73   | 71   | 172  | 43   | 41  | 28  | 56  | 22  | 62.55492591 | -0.889278152  |
| A730017C20Rik | 36   | 16   | 45   | 30   | 13  | 19  | 16  | 4   | 22.04786356 | -0.887503771  |
| Apitd1        | 45   | 63   | 18   | 40   | 19  | 24  | 16  | 12  | 29.16206318 | -0.886497654  |
| Fhl3          | 92   | 143  | 143  | 111  | 60  | 87  | 61  | 42  | 90.93113744 | -0.886117189  |
| Adgrb1        | 57   | 56   | 320  | 34   | 13  | 29  | 62  | 15  | 72.57766695 | -0.883849176  |
| AI504432      | 624  | 447  | 696  | 686  | 409 | 398 | 331 | 137 | 457.6899977 | -0.8823857092 |
| Nrxn3         | 33   | 36   | 168  | 12   | 7   | 11  | 22  | 16  | 38.23084416 | -0.882385803  |
| Tnni3         | 1877 | 118  | 874  | 974  | 175 | 571 | 287 | 199 | 641.3228172 | -0.880370565  |
| Tnfrsf26      | 69   | 143  | 67   | 51   | 48  | 46  | 34  | 25  | 59.05475997 | -0.879720646  |
| Fpr1          | 218  | 140  | 403  | 246  | 211 | 110 | 88  | 35  | 177.6382195 | -0.879214307  |
| Cd33          | 130  | 131  | 520  | 179  | 120 | 108 | 71  | 87  | 167.6904826 | -0.878367172  |
| Tubb3         | 104  | 110  | 175  | 74   | 68  | 57  | 42  | 51  | 84.86547182 | -0.878324767  |
| LOC100038947  | 191  | 91   | 161  | 113  | 83  | 47  | 28  | 71  | 99.50990226 | -0.875694584  |
| Fam163b       | 13   | 6    | 53   | 5    | 1   | 4   | 4   | 3   | 11.16934727 | -0.875536607  |
| Gm12185       | 124  | 101  | 76   | 147  | 71  | 56  | 47  | 4   | 76.17492743 | -0.874864045  |
| Ifi2712a      | 307  | 179  | 307  | 481  | 166 | 131 | 212 | 106 | 235.0715023 | -0.874463682  |
| Plau          | 331  | 765  | 172  | 371  | 240 | 209 | 204 | 50  | 282.5325238 | -0.874293727  |
| Nfasc         | 65   | 44   | 197  | 29   | 25  | 35  | 33  | 24  | 56.3878115  | -0.874025323  |
| Fgf12         | 72   | 25   | 157  | 76   | 17  | 54  | 35  | 8   | 54.76943299 | -0.873890352  |
| Mir124a-1hg   | 18   | 21   | 112  | 15   | 7   | 13  | 15  | 9   | 26.13139048 | -0.873701957  |
| Sp5           | 425  | 565  | 74   | 376  | 252 | 108 | 108 | 21  | 234.0629368 | -0.872962866  |
| Frrs1l        | 16   | 22   | 80   | 9    | 5   | 10  | 14  | 2   | 19.40164529 | -0.872719536  |
| Gadd45a       | 1410 | 1180 | 776  | 1089 | 902 | 629 | 500 | 240 | 824.0503065 | -0.872680331  |
| Ccl17         | 383  | 516  | 161  | 306  | 87  | 46  | 18  | 190 | 217.698215  | -0.872073168  |
| Shcbp1l       | 28   | 16   | 7    | 22   | 9   | 9   | 2   | 3   | 11.90860473 | -0.871834735  |
| Kif22         | 88   | 205  | 60   | 143  | 80  | 69  | 50  | 26  | 87.54601713 | -0.871432352  |
| Scrt1         | 14   | 11   | 93   | 7    | 7   | 4   | 8   | 5   | 18.58330796 | -0.870772896  |
| Cd72          | 458  | 457  | 103  | 304  | 171 | 173 | 86  | 125 | 233.5590441 | -0.868504738  |
| Sez6          | 24   | 22   | 176  | 21   | 5   | 19  | 19  | 12  | 37.18322243 | -0.868337889  |
| Dscam         | 14   | 9    | 36   | 15   | 6   | 11  | 4   | 3   | 12.1105382  | -0.86821674   |
| Bcl11a        | 55   | 54   | 80   | 64   | 43  | 42  | 17  | 20  | 46.25818727 | -0.868043473  |
| Arhgap27os3   | 24   | 23   | 28   | 36   | 20  | 16  | 9   | 4   | 19.53906183 | -0.867806174  |
| Naip5         | 234  | 571  | 199  | 223  | 175 | 189 | 96  | 104 | 219.0458979 | -0.867716677  |
| Rnf112        | 42   | 49   | 201  | 24   | 24  | 25  | 39  | 14  | 51.61773013 | -0.867287714  |
| Phgr1         | 25   | 152  | 69   | 32   | 19  | 17  | 15  | 32  | 44.73377779 | -0.867163512  |
| Adora2b       | 916  | 771  | 387  | 943  | 682 | 298 | 275 | 96  | 533.2096104 | -0.865625517  |
| Gjb3          | 236  | 1112 | 129  | 278  | 263 | 137 | 106 | 103 | 285.5485987 | -0.864972751  |
| Prss16        | 20   | 39   | 31   | 15   | 7   | 13  | 16  | 7   | 18.17835749 | -0.864435613  |





|      |    |    |    |    |   |   |    |   |             |              |                           |
|------|----|----|----|----|---|---|----|---|-------------|--------------|---------------------------|
| CCL7 | 47 | 34 | 45 | 58 | 9 | 7 | 20 | 2 | 27.46431307 | -1.485623937 | <a href="#">Ruxo DOWN</a> |
|------|----|----|----|----|---|---|----|---|-------------|--------------|---------------------------|
